# Supplementary material for: Efficient Somatic Embryogenesis, Regeneration and Acclimatization of Panax ginseng Meyer: True-to-Type Conformity of Plantlets as Confirmed by ISSR Analysis
Source: MDPI journal article supplement (doi:10.3390/plants12061270), 2023-03-10
Supplement: s1 [file s1]

# **Efficient Somatic Embryogenesis, Regeneration and Acclimatization of *Panax ginseng* Meyer: True-to-Type Conformity of Plantlets as Confirmed by ISSR Analysis**

## **Supplementary Materials**

**Jung-Woo Lee <sup>1,2</sup>, Jang-Uk Kim <sup>1</sup>, Kyong-Hwan Bang <sup>1</sup>, Nayeong Kwon <sup>1</sup>, Young-Chang Kim <sup>3</sup>, Ick-Hyun Jo <sup>4</sup> and Young-Doo Park <sup>2,\*</sup>**

<sup>1</sup> Department of Herbal Crop Research, National Institution of Horticultural and Herbal Science, Rural Development Administration, Eumseong 27709, Republic of Korea

<sup>2</sup> Department of Horticultural Biotechnology, Kyung Hee University, Yongin 17104, Republic of Korea

<sup>3</sup> Research Policy Bureau, Rural Development Administration, Jeonju 54875, Republic of Korea

<sup>4</sup> Department of Crop Science and Biotechnology, Dankook University, Cheonan 31116, Republic of Korea

\*Correspondence: ydpark@khu.ac.kr; Tel.: +82-10-3338-9344

**Table S1.** ISSR primers for evaluating the genetic fidelity of the plants regenerated from somatic embryogenesis of *P. ginseng*

| Primer code | Sequence (5'–3')       | Number of amplicon | Amplicon size range (bp) |
|-------------|------------------------|--------------------|--------------------------|
| UBC809      | AGA GAG AGA GAG AGA GG | 5                  | 370–590                  |
| UBC818      | CAC ACA CAC ACA CAC AG | 1                  | 680                      |
| UBC821      | GTGTGTGTGTGTGTGTT      | 1                  | 750                      |
| UBC827      | ACA CAC ACA CAC ACA CG | 2                  | 700–770                  |
| UBC868      | GAAGAAGAAGAAGAAGAA     | 4                  | 380–770                  |
| UBC878      | GGATGGATGGATGGAT       | 1                  | 680                      |

ISSR, inter-simple sequence repeats

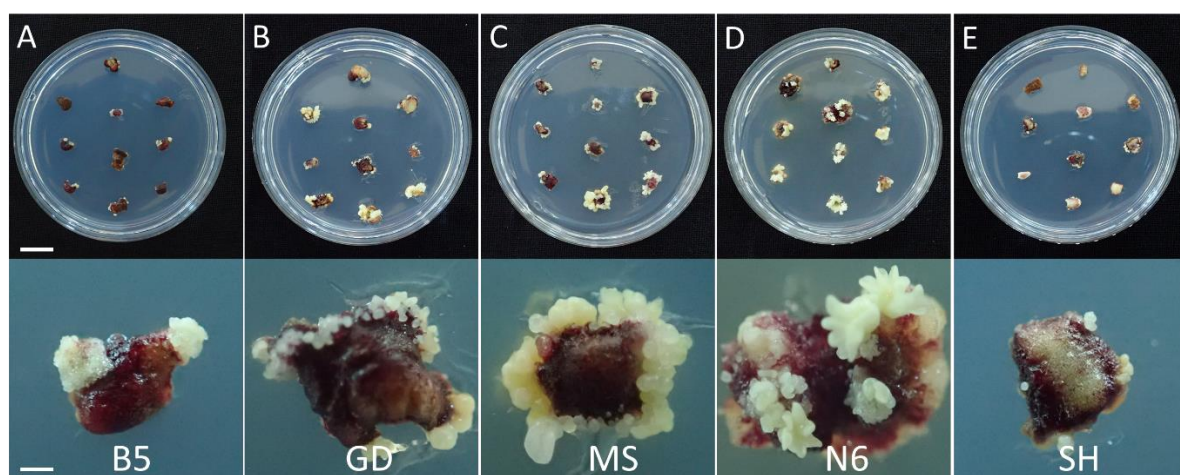

**Figure S1.** Somatic embryogenesis as influenced by basal media in *P. ginseng* 60 days after inoculation. (A) B5, (B) GD, (C) MS, (D) N6, and (E) SH. Scale bars, upper 1 cm; bottom 1 mm.

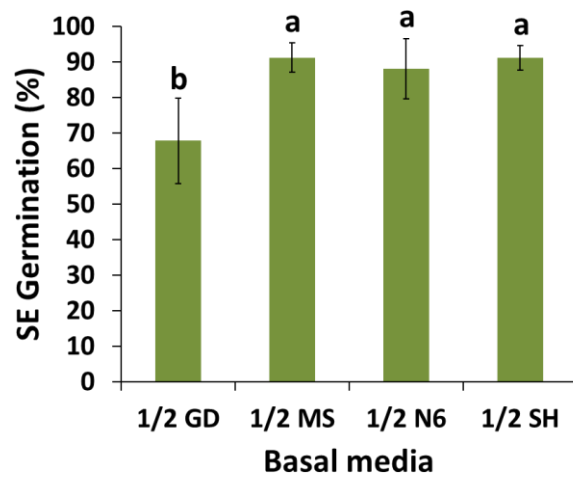

**Figure S2.** Effect of basal media type in the germination media on SEs germination of *P. ginseng*. Data were recorded 30 days after transfer SEs to germination medium. Values represent the mean  $\pm$  standard errors of three independent experiments each of which consisted of 10 explants. The non-significant or significant differences were determined by the ANOVA. Different letters within each column represent a significant difference at  $p \leq 0.05$  based on Duncan's multiple comparison test. SEs, somatic embryos

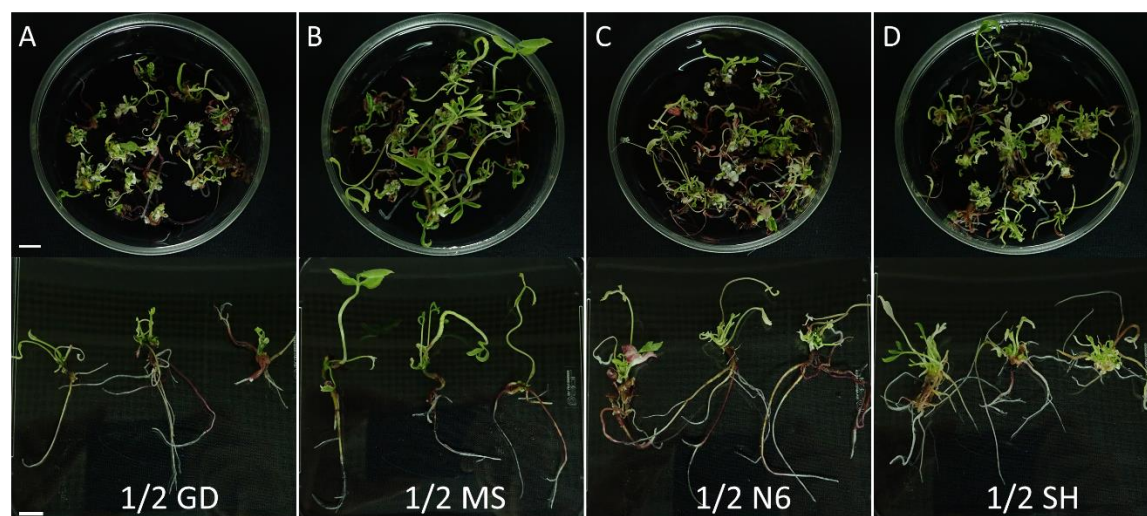

**Figure S3.** Plant regeneration as influenced by the basal media in the germination medium 60 days after transfer to the elongation medium. (A) 1/2 GD, (B) 1/2 MS, (C) 1/2 N6, and (D) 1/2 SH. Scale bars, 1 cm.
